# Supplementary material for: Frequency-regulated pulsed electrodeposition of CuInS2 on ZnO nanorod arrays as visible light photoanodes
Source: Royal Society of Chemistry journal article supplement (doi:10.1039/c5ta03255e), 2015-01-01
Supplement: c5ta03255e1.pdf [file c5ta03255e1.pdf]

## Supporting Information

# Frequency-regulated Pulsed Electrodeposition of $\text{CuInS}_2$ on ZnO Nanorod Arrays as Visible Light Photoanodes

Yiming Tang, Peng Wang, Jung-Ho Yun, Rose Amal\* and Yun Hau Ng\*

Particles and Catalysis Research Group, School of Chemical Engineering, The University of New South Wales, Sydney NSW 2052, Australia.

Corresponding authors: [r.amal@unsw.edu.au](mailto:r.amal@unsw.edu.au); [yh.ng@unsw.edu.au](mailto:yh.ng@unsw.edu.au)

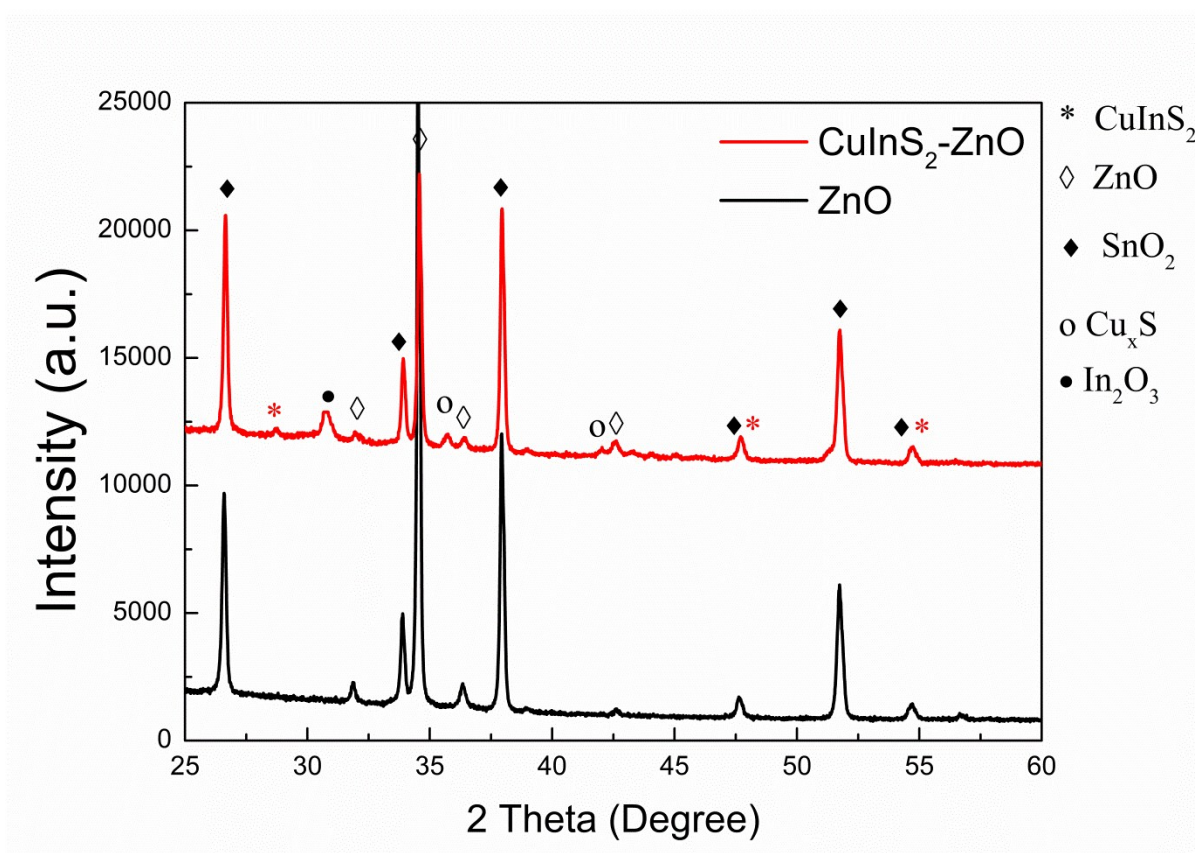

Figure S1. XRD patterns of the (a) ZnO and (b)  $\text{CuInS}_2$ -ZnO films from pulsed-electrodeposition (cathodic voltage: -1.25 V; relaxation voltage: 0 V).

XRD patterns confirm the formation of crystallized ZnO with dominant (002) plane on the FTO substrate in both ZnO and  $\text{CuInS}_2$ -ZnO films. In addition to all ZnO peaks,  $\text{CuInS}_2$ -ZnO film shows a peak with low intensity at  $27.4^\circ$  attributed to the (112) planes of  $\text{CuInS}_2$ . The peak intensity of  $\text{CuInS}_2$  is low because of the small amount of deposit on the ZnO nanoarrays. Therefore, the characterization of  $\text{CuInS}_2$  is further supported by HRTEM and UV-Vis Tauc plot analyses, as presented in the main article.
